# Supplementary material
Source: publisher site journal article supplement (https://neobiota.pensoft.net/article/90473/download/suppl/34/)
Supplement: Supplementary file 1

**Supplementary material 4** for the article by Andrey N. Reshetnikov et al. “Rarely naturalized, but widespread and even invasive: the paradox of a popular pet terrapin expansion in Eurasia”.

Journal: NeoBiota.

Corresponding author: Andrey N Reshetnikov

e-mail: anreshetnikov@yandex.ru

**Table S2.** Coding of collected field data

| Parameter                  | Coding | Value                                                                                                                       |
|----------------------------|--------|-----------------------------------------------------------------------------------------------------------------------------|
| Habitat characteristics    | 1      | Areas outside human settlements (natural environments)                                                                      |
|                            | 2      | Human settlements outside recreational zones                                                                                |
|                            | 3      | Recreational zones (parks, botanical gardens etc.)                                                                          |
| Size (CL, cm)              | 1      | $\leq 5$                                                                                                                    |
|                            | 2      | $5 < x \leq 10$                                                                                                             |
|                            | 3      | $10 < x \leq 15$                                                                                                            |
|                            | 4      | $15 < x \leq 20$                                                                                                            |
|                            | 5      | $> 20$ cm                                                                                                                   |
|                            | 6      | “adult” (without exact information about sizes)                                                                             |
|                            | 7      | all sizes                                                                                                                   |
| Ecological characteristics | 1      | Casual record without specific observations on ecology                                                                      |
|                            | 2      | Overwintering                                                                                                               |
|                            | 3      | Reproductive attempts (egg laying without confirmation of hatchlings)                                                       |
|                            | 4      | Successful reproduction (appearance of hatchlings)                                                                          |
|                            | 5      | Establishment of population (presence of several adults during many years (>2 years) + evidence of successful reproduction) |

Key features for affiliation of data to categories were the following: coloration and drawing of patches on a head and a neck (visually or by photographs), pigmentation of plastron (if available) for subspecies identification; observation of specimens in early spring (or presence during several consecutive years) for evidence of successful wintering; egg-laying behavior as reproduction attempts; appearance of hatchlings from clutches as evidence of successful reproduction. The presence of several specimens in a water body during several consecutive years with above-mentioned key features of successful reproduction were regarded as confirmation of establishment of a population (i.e., naturalization).
